# Supplementary material
Source: ML conference proceedings conference paper supplement (https://aclanthology.org/2024.emnlp-main.141)

# Length & Height compression ratio of AutoCrawl

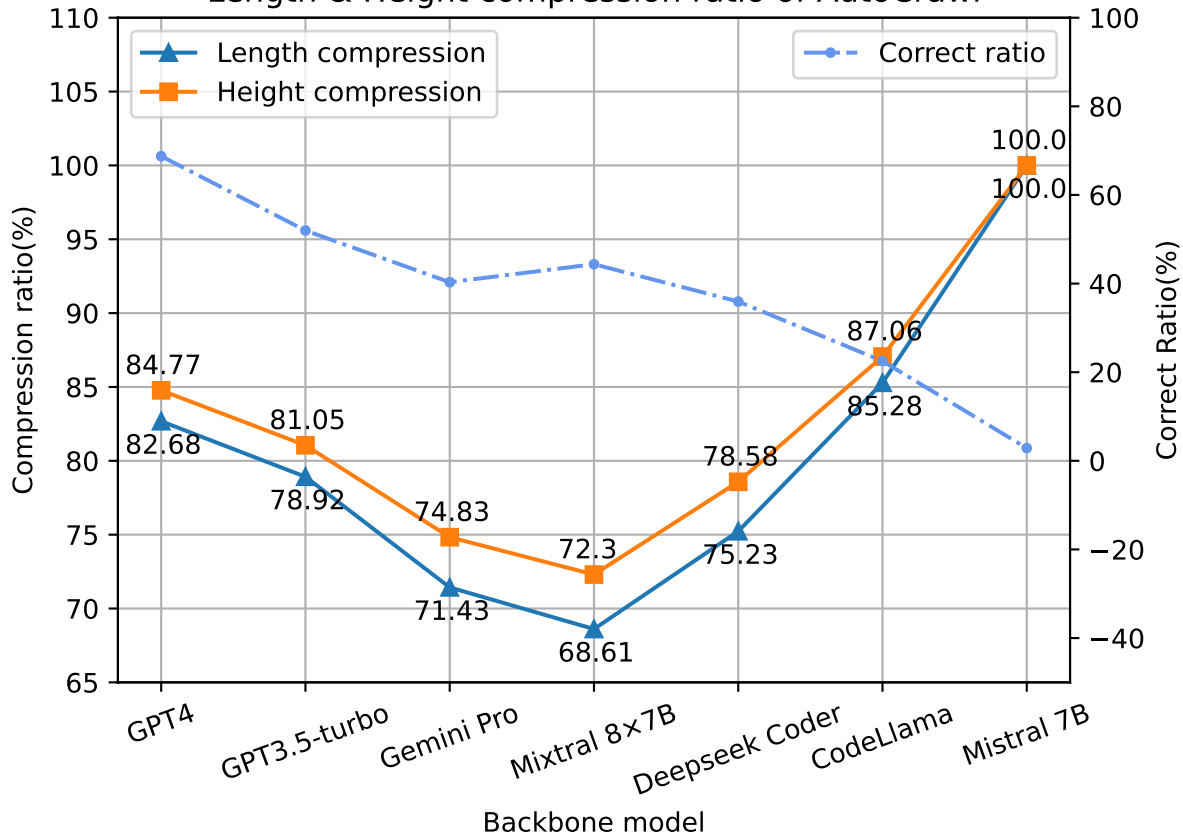

Supplement: software [file 2024.emnlp-main.141.software.zip]
